# Supplementary material for: Interface construction of CuCoSe@NiS based on an ultrathin nanosheet for high-performance supercapacitors
Source: Royal Society of Chemistry journal article supplement (doi:10.1039/d4ta01430h), 2024-01-01
Supplement: d4ta01430h1.pdf [file d4ta01430h1.pdf]

## Supporting Information

### Interface construction of CuCoSe@NiS based on the ultrathin nanosheet towards high-performance supercapacitors

Wenrui Wu <sup>a</sup>, Yue Yan <sup>a</sup>, Xing Wang <sup>a</sup>, Chengzhi Wei <sup>a</sup>, Yang Yang <sup>a</sup>, Tao Xu <sup>c</sup>,  
Xianfu Li <sup>a, b, \*</sup>

<sup>a</sup> School of Chemical and Environmental Engineering, Anhui Polytechnic University,  
Wuhu 241000, China

<sup>b</sup> Anhui Provincial Key Laboratory of High Performance Film Capacitors and  
Materials, Wuhu, Anhui, 241000, China

<sup>c</sup> Department of Chemistry and Applied Biological Sciences, South Dakota School of  
Mines and Technology, Rapid City, SD 57701, USA

\* **Corresponding author:** Xianfu Li

**E-mail address:** [lixianfu@ahpu.edu.cn](mailto:lixianfu@ahpu.edu.cn)

## S1: EDS result

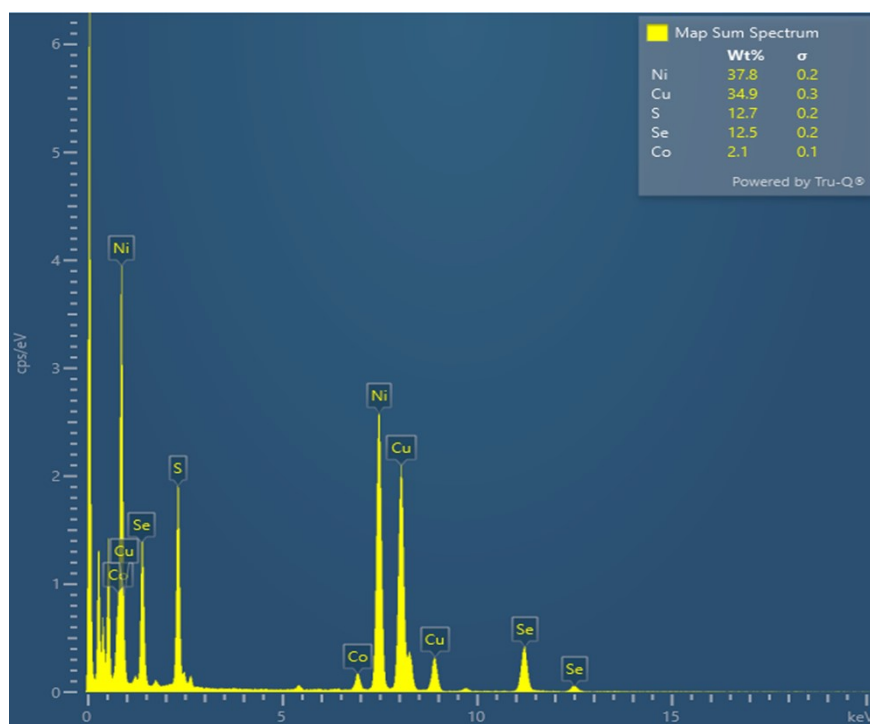

**Fig. S1.** EDS image of CuCoSe@NiS/NF (the inserted table is the element content).

## S2: Electrochemical properties of CuCoSe/NF and NiS/NF

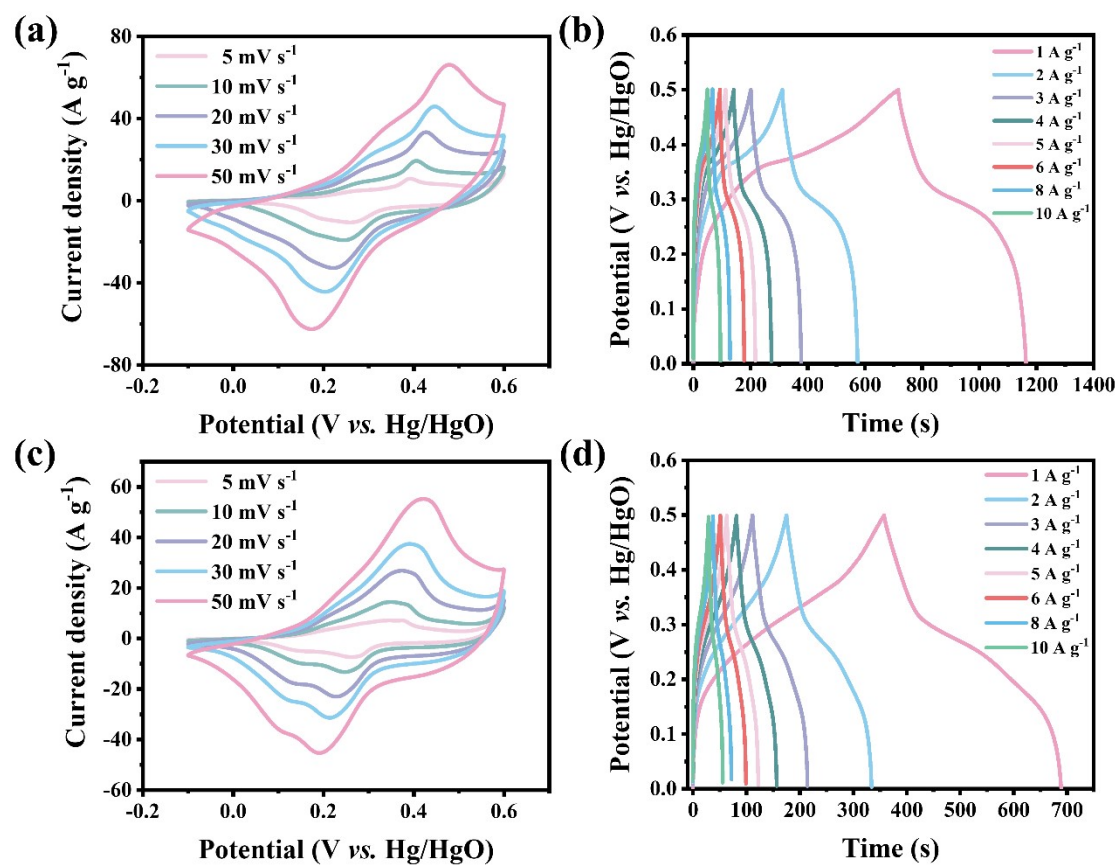

**Fig. S2.** (a) CV curves of CuCoSe/NF. (b) GCD curves of CuCoSe/NF. (c) CV curves of NiS/NF. (d) GCD curves of NiS/NF.

### S3: Equivalent circuit fitting

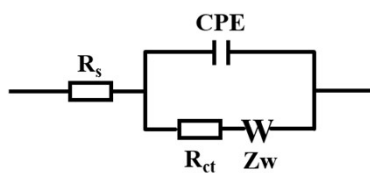

**Fig. S3.** Fitted equivalent circuit diagram.

**Table S1** The related parameters of the equivalent circuit diagram of the EIS curves of NiS/NF, CuCoSe/NF, CuCoSe@NiS/NF

| Resistance            | NiS/NF | CuCoSe/NF | CuCoSe@NiS/NF |
|-----------------------|--------|-----------|---------------|
| $R_s$ ( $\Omega$ )    | 0.61   | 0.62      | 0.60          |
| $R_{ct}$ ( $\Omega$ ) | 2.4    | 1.72      | 1.1           |

#### S4: Cycle stability test of CuCoSe/NF and NiS/NF

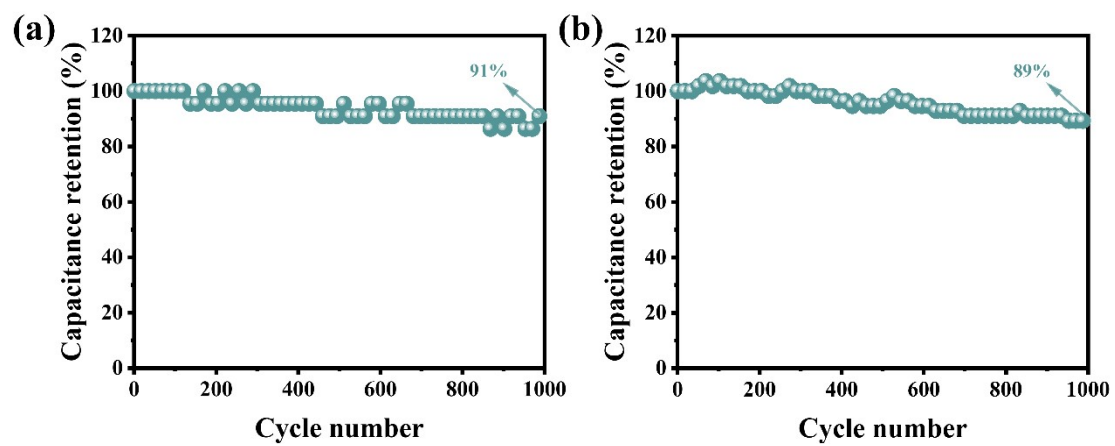

**Fig. S4.** (a) Cycling performance of CuCoSe/NF at 15 A g<sup>-1</sup>. (b) Cycling performance of NiS/NF at 15 A g<sup>-1</sup>.

**S5: SEM images of CuCoSe@NiS/NF**

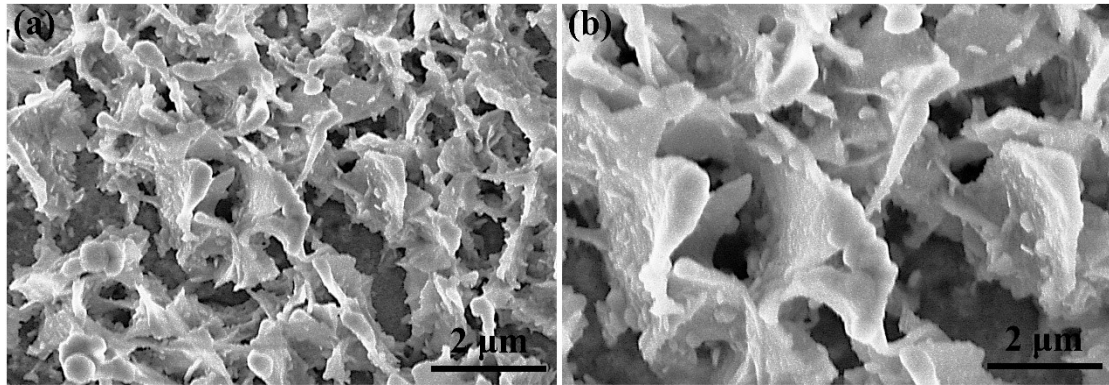

**Fig. S5.** (a-b) SEM images of CuCoSe@NiS/NF after cycle stability test.

### S6: Electrochemical performance of AC.

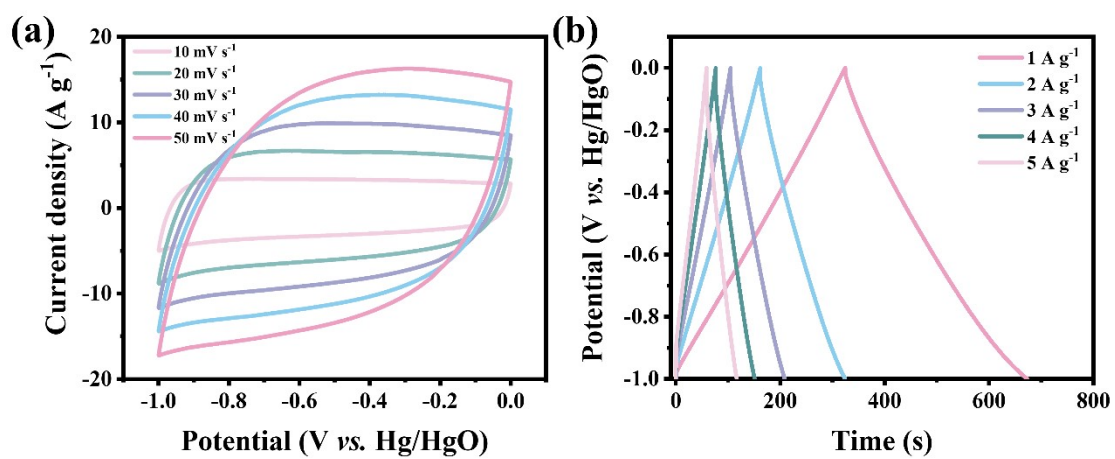

Fig. S6. (a) CV curves of AC. (b) GCD curves of AC.
